# Supplementary material
Source: ML conference proceedings conference paper supplement (https://openaccess.thecvf.com/content/WACV2021/html/Kang_ATM_Attentional_Text_WACV_2021_paper.html)
Supplement: Supplementary file 1 [file Kang_ATM_Attentional_Text_WACV_2021_supplemental.pdf]

# ATM: Attentional Text Matting

## Supplementary Material

### A. Supplement

#### A.1. Applying on Real Images

We apply our method and baseline image matting methods on more real images and compare their qualitative results. Figure 1 and Figure 2 present their text matting performance on real English posters. Figure 3 and Figure 4 present their text matting performance on real Chinese posters. These four figures clearly demonstrate the superiority of our method over previous image matting methods on the task of text matting. In addition, compared with SHM [1], our method is better at focusing on the interested text regions. This indicates the effectiveness of the attentional text region detector in our method.

#### A.2. Visualization of Our Method

We visualize the intermediate results of our method in Figure 5 to help readers understand our method well. The first column is the original input image. The second column is the detection result from the attentional text region detector. Afterwards, each detected region is sent to T-Net to get the trimap prediction shown in the third column. Then, each detected region and trimap prediction are sent to M-Net to get the matte prediction for the detected region. Finally, the post-processing module filters out false detected regions based on matte predictions. The last column presents the final matte prediction of our method.

#### A.3. Poster Generation

As we mentioned in the paper, we build a simple poster generation system. This system accepts a new input movie background and the extracted movie title as its inputs. And it randomly chooses a paste position from the position set  $P$  [top-left, top-middle, top-right, middle, bottom-left, bottom-middle, bottom-right]. Finally, based on the paste position, the poster generation system re-composites the new input movie background with the extracted movie title to obtain a new creative poster.

Figure 6, 7, 8, and 9 demonstrate the English and Chinese poster generation performance. More specifically, the first column is the original posters, we utilize our text matting method to extract the movie titles from these posters.

The extracted movie titles are shown in the second column. The third column shows the new input movie backgrounds. And the last column presents the new generated creative posters from our poster generation system. As shown in the last column, our poster generation system is able to generate high-quality posters.

### References

- [1] Quan Chen, Tiezheng Ge, Yanyu Xu, Zhiqiang Zhang, Xinxin Yang, and Kun Gai. Semantic human matting. In *2018 ACM Multimedia Conference on Multimedia Conference*, pages 618–626. ACM, 2018.

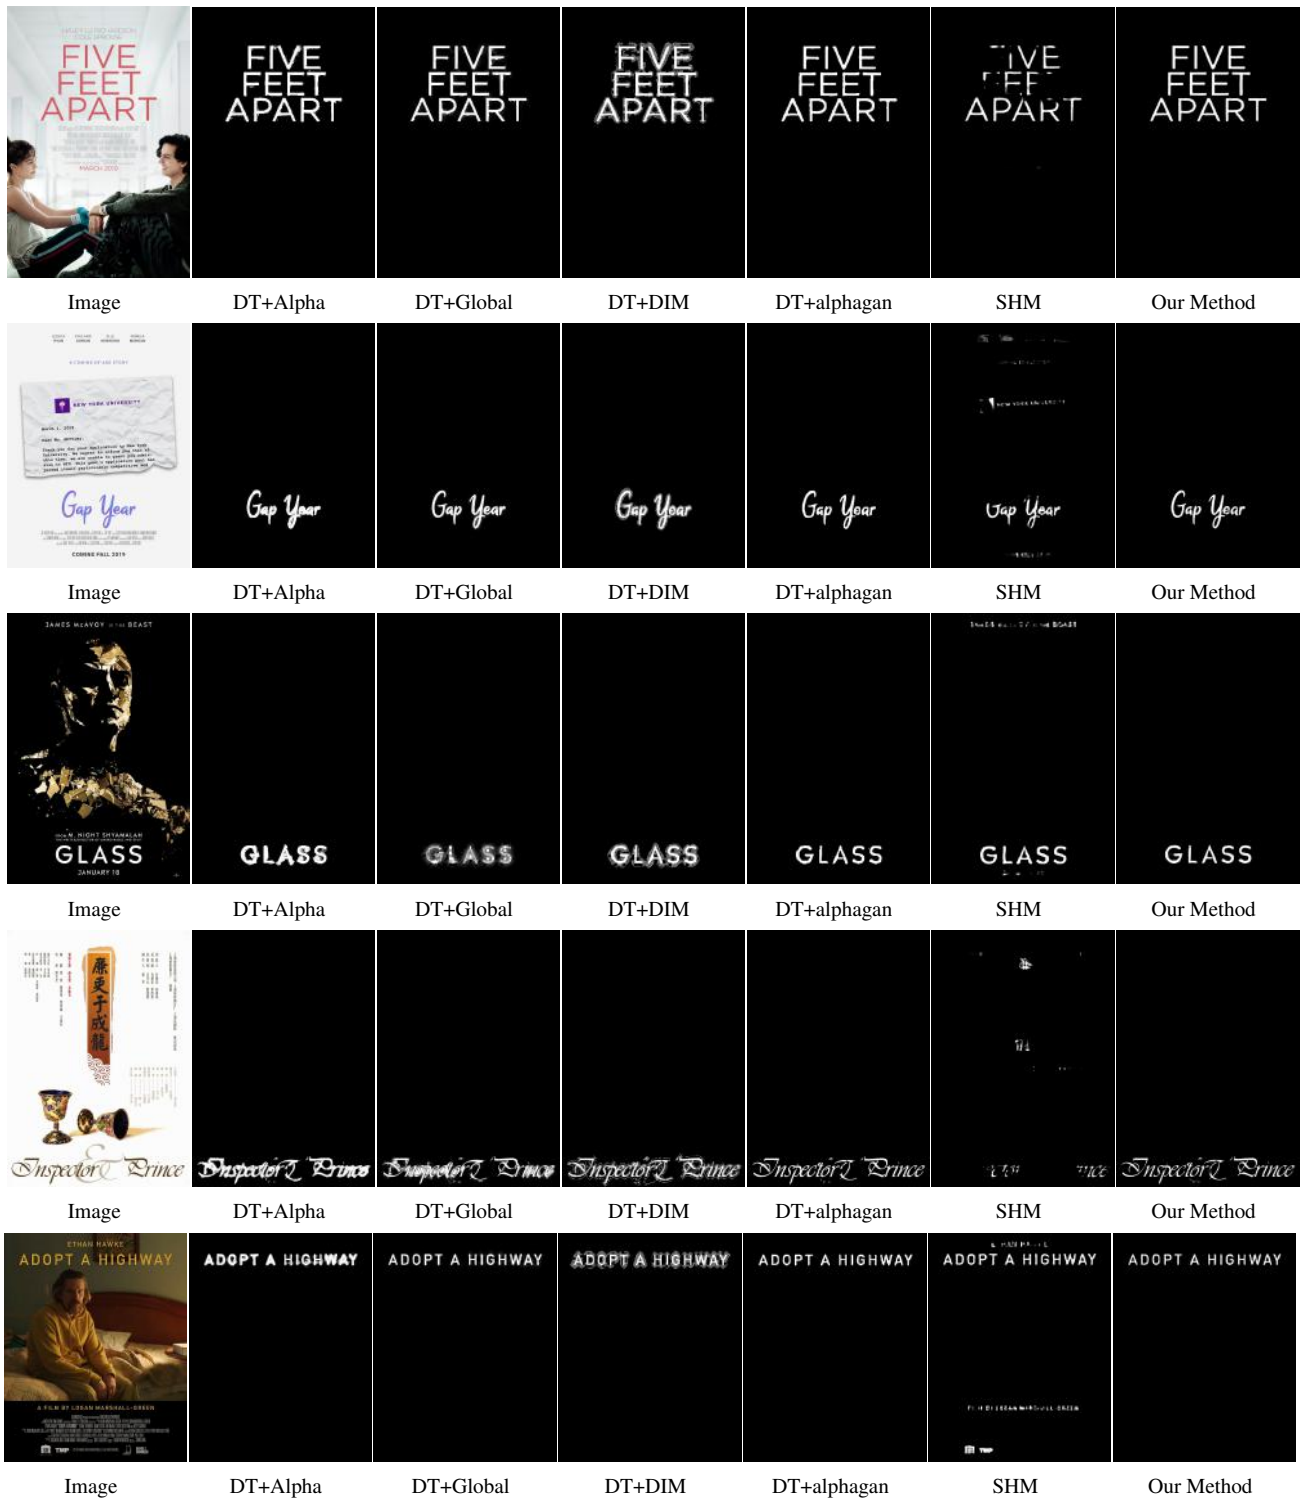

Figure 1. The qualitative results of our method and baseline matting methods with the generated trimap from attentional text region detector and T-Net on real English posters

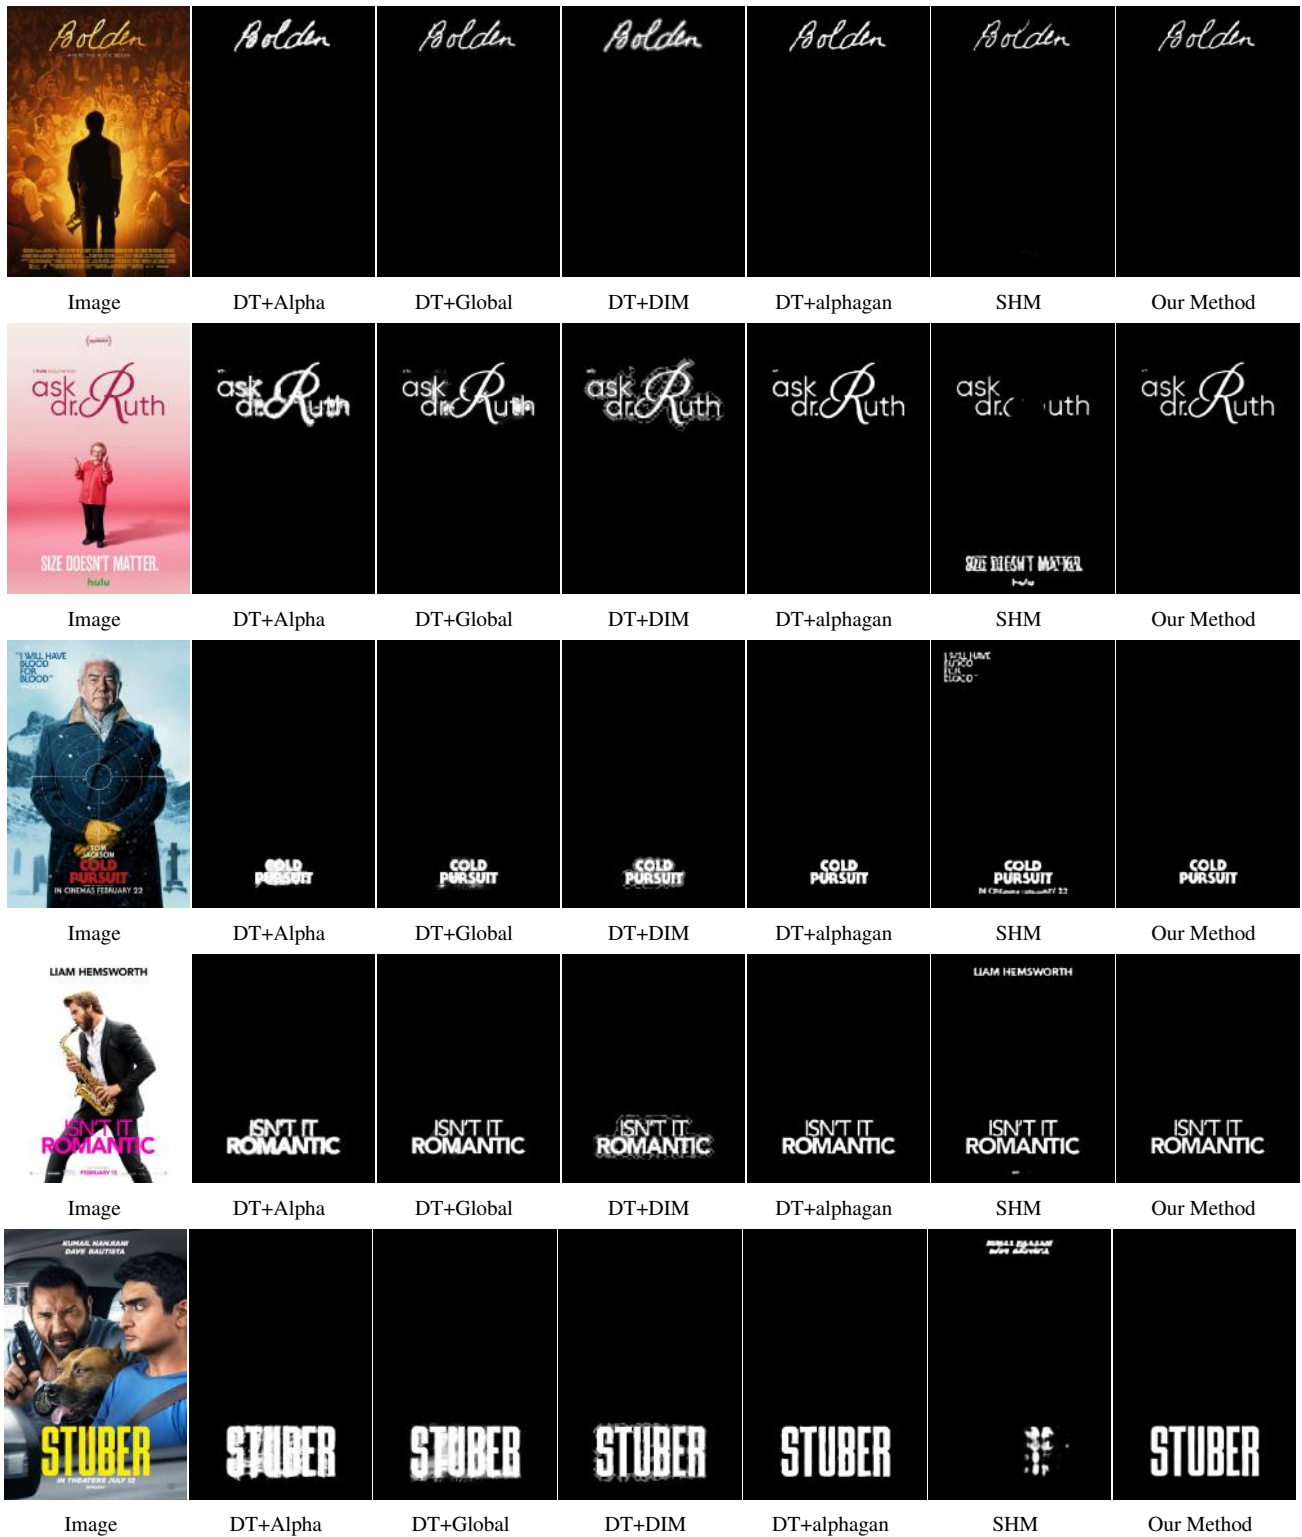

Figure 2. More qualitative results of our method and baseline matting methods with the generated trimap from attentional text region detector and T-Net on real English posters

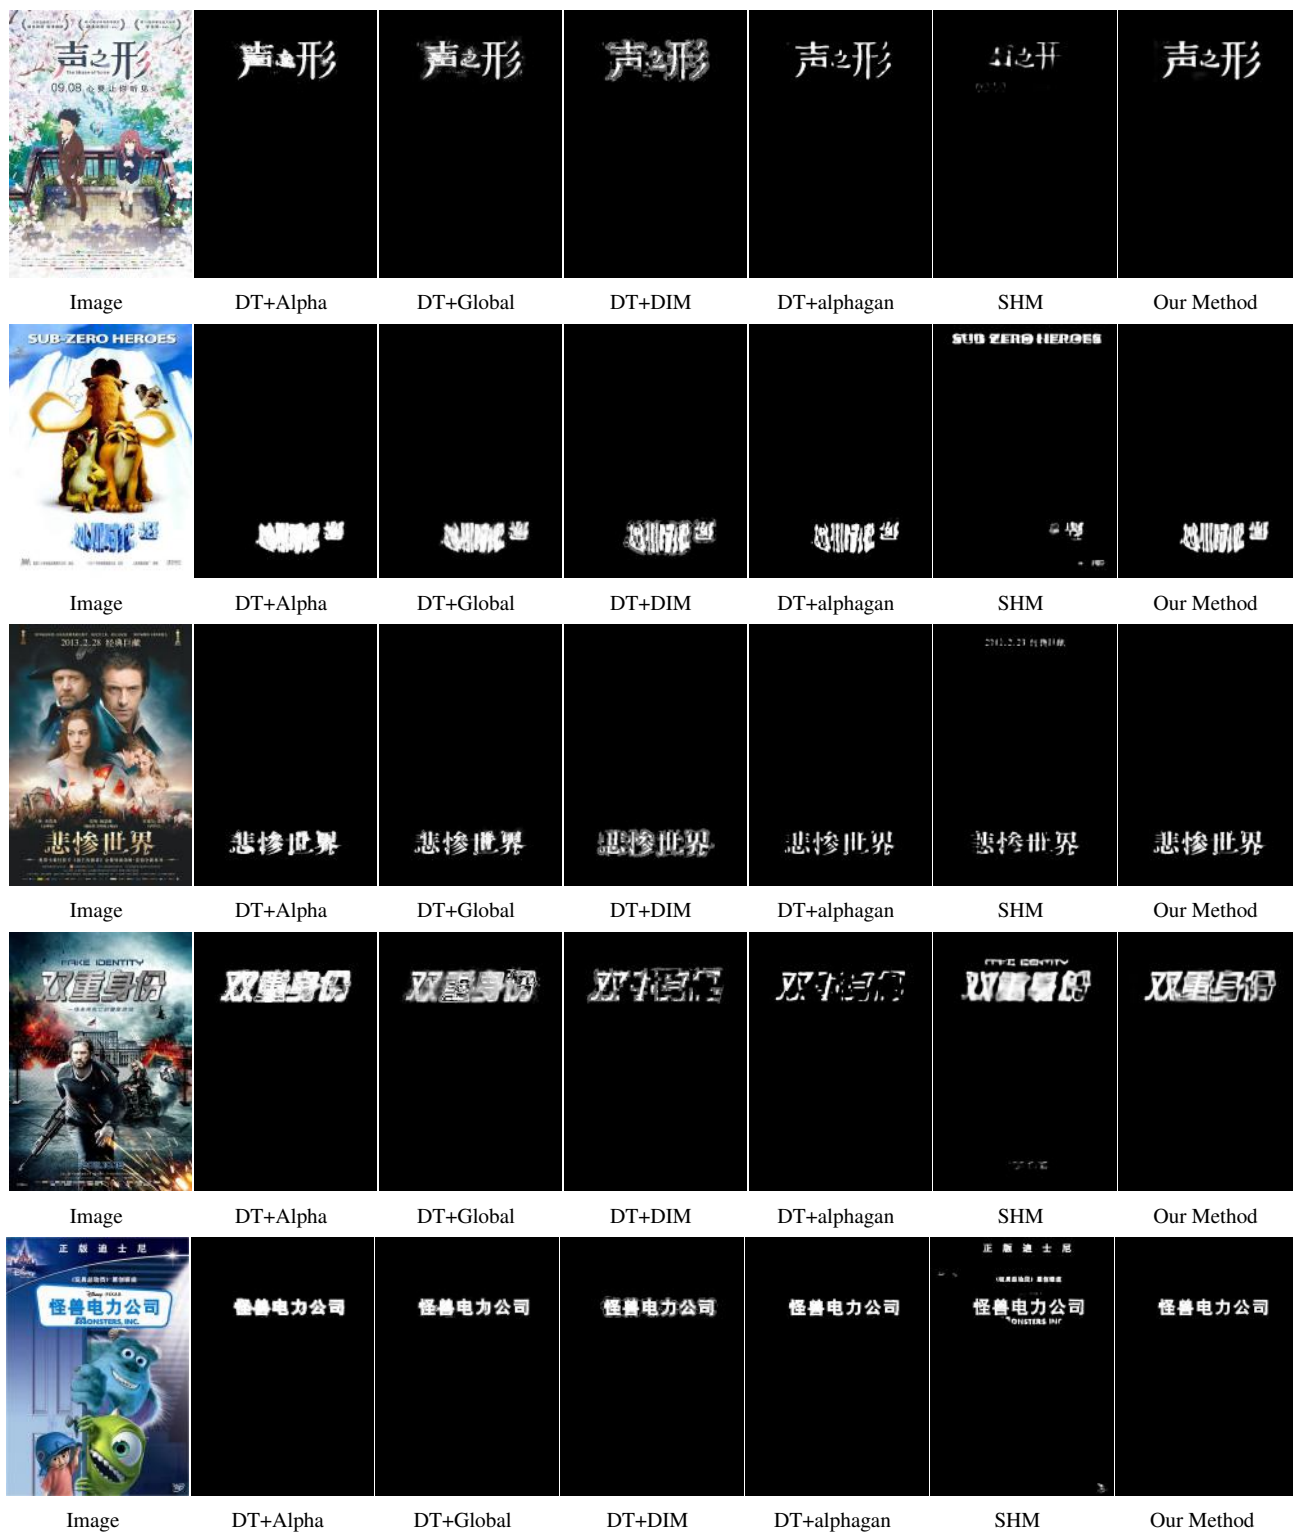

Figure 3. The qualitative results of our method and baseline matting methods with the generated trimap from attentional text region detector and T-Net on real Chinese posters

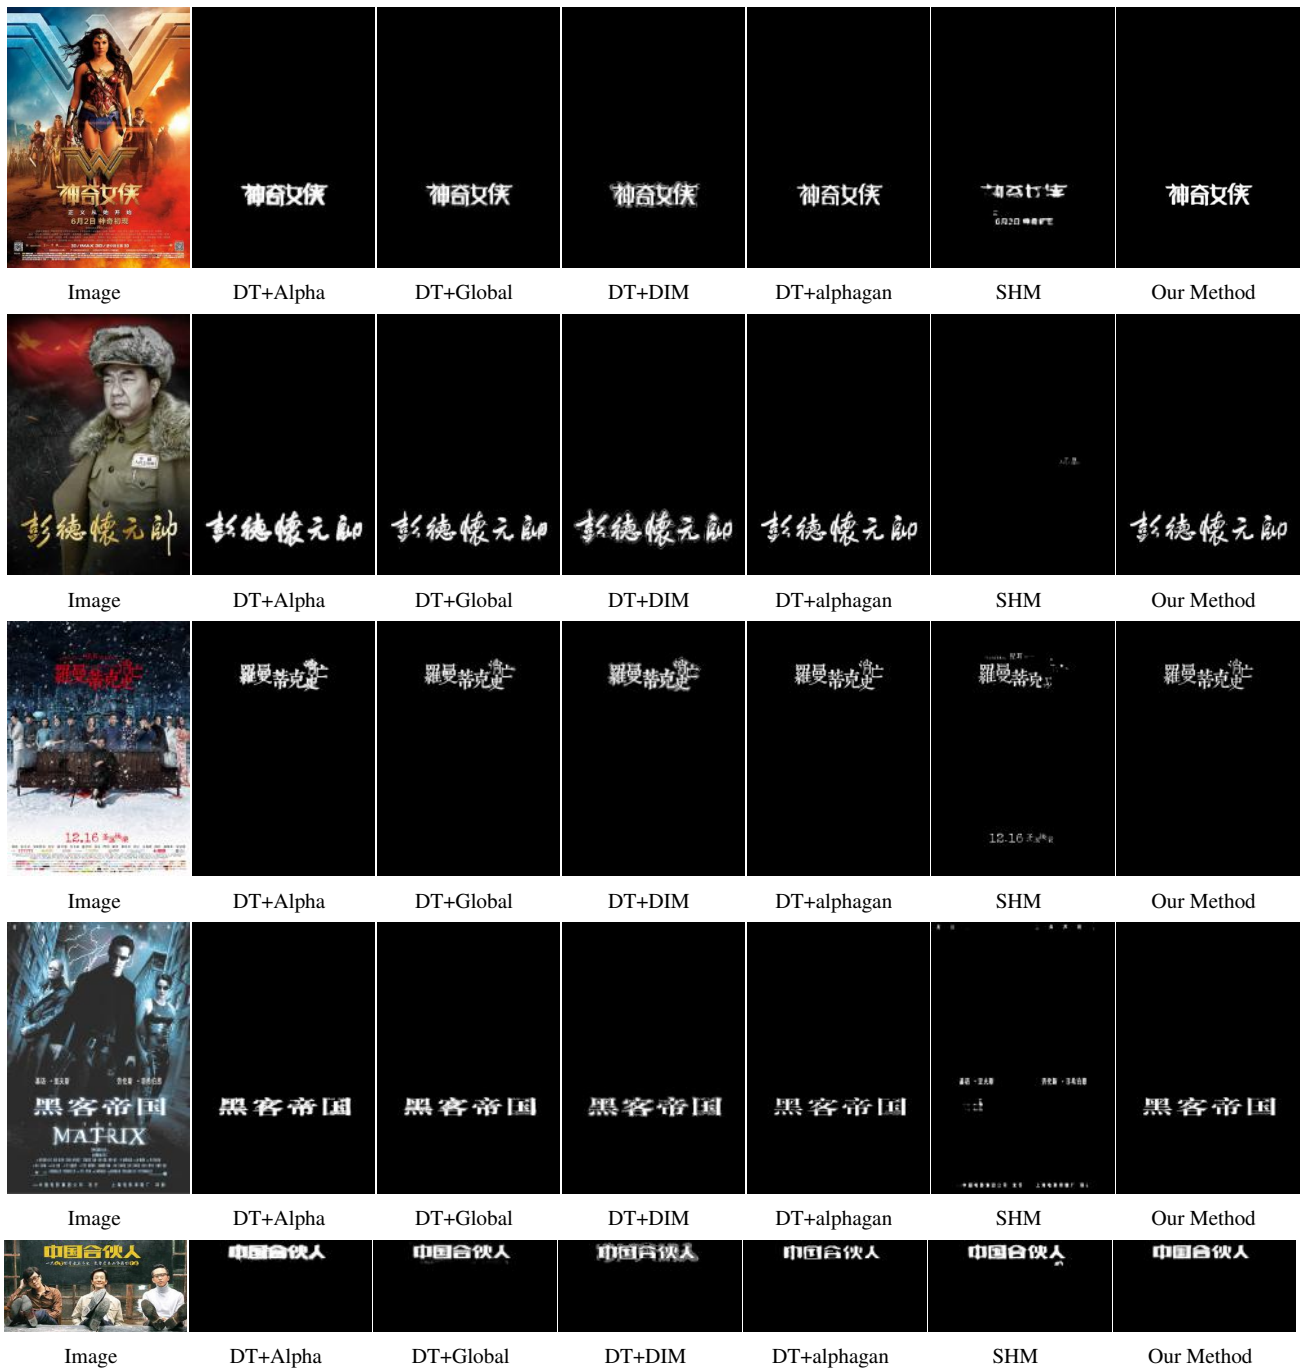

Figure 4. More qualitative results of our method and baseline matting methods with the generated trimap from attentional text region detector and T-Net on real Chinese posters

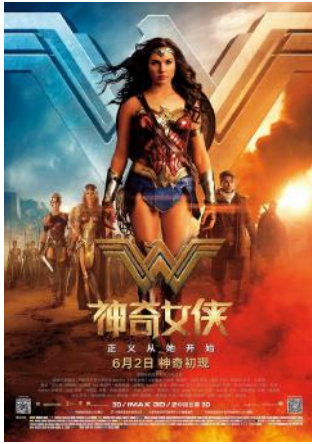

Input Image

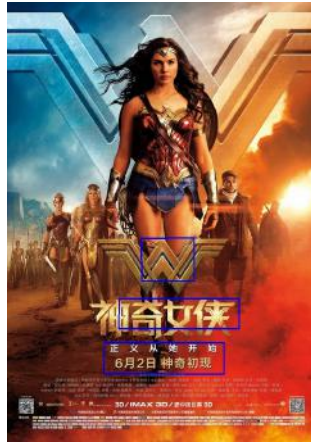

Detection Result

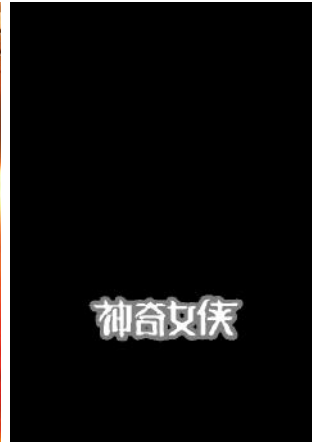

Trimap Prediction

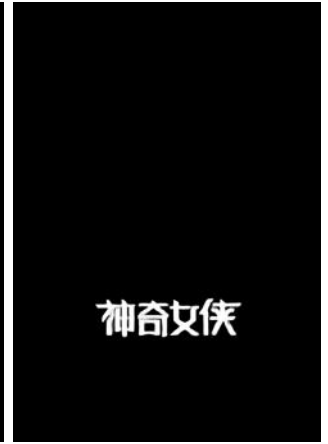

Matte Prediction

Figure 5. Intermediate Visualization of Our Method

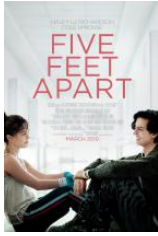

Sample Poster

FIVE FEET APART

Extracted Movie Title

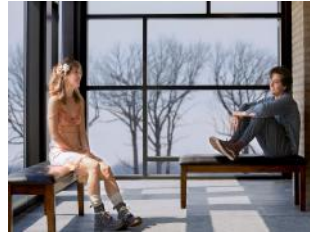

Input Background

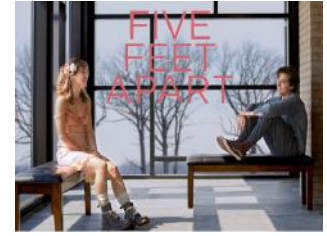

New Creative Poster

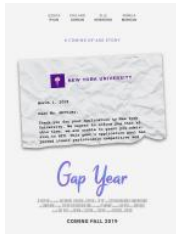

Sample Poster

Gap Year

Extracted Movie Title

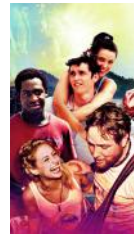

Input Background

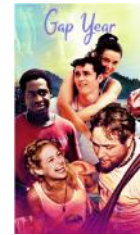

New Creative Poster

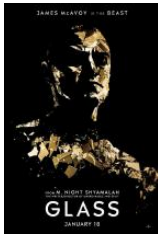

Sample Poster

GLASS

Extracted Movie Title

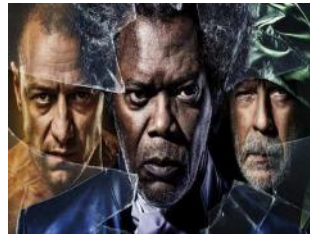

Input Background

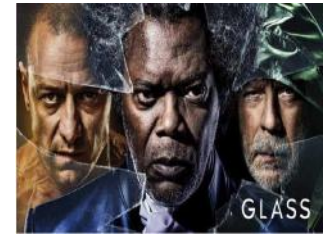

New Creative Poster

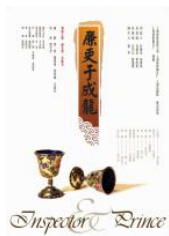

Sample Poster

Inspector Dime

Extracted Movie Title

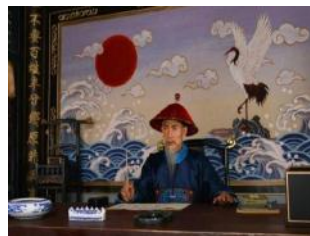

Input Background

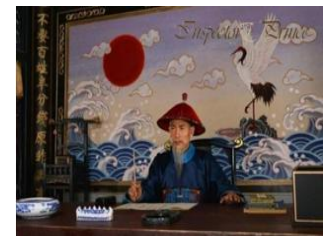

New Creative Poster

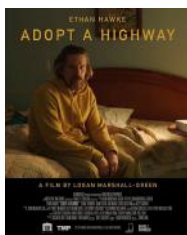

Sample Poster

ADOPT A HIGHWAY

Extracted Movie Title

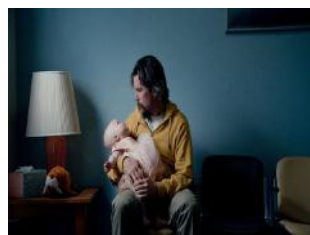

Input Background

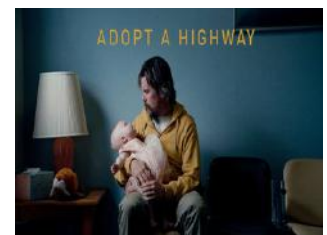

New Creative Poster

Figure 6. English Poster Generation

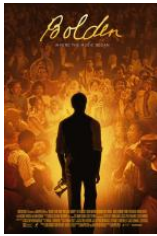

Sample Poster

Golden

Extracted Movie Title

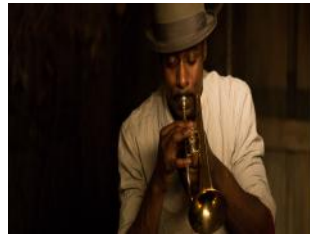

Input Background

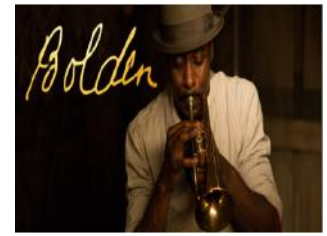

New Creative Poster

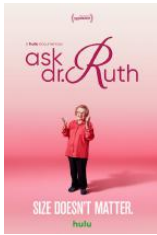

Sample Poster

ask dr. Ruth

Extracted Movie Title

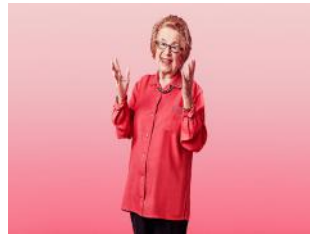

Input Background

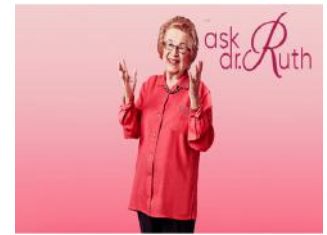

New Creative Poster

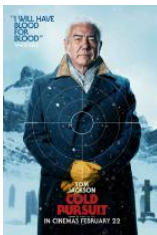

Sample Poster

COLD PURSUIT

Extracted Movie Title

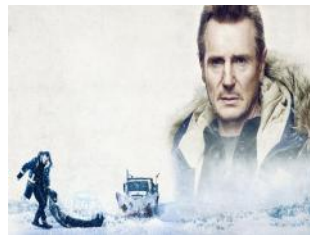

Input Background

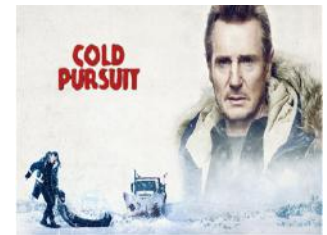

New Creative Poster

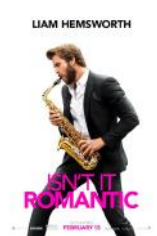

Sample Poster

ISN'T IT ROMANTIC

Extracted Movie Title

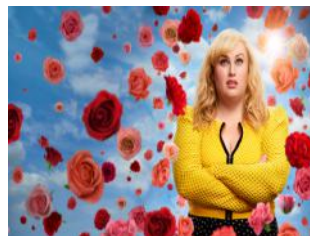

Input Background

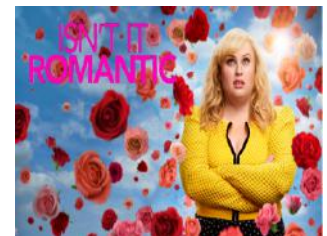

New Creative Poster

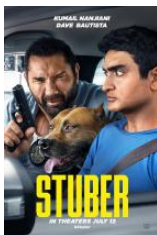

Sample Poster

STUBER

Extracted Movie Title

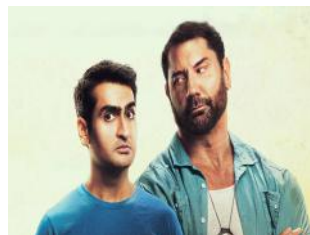

Input Background

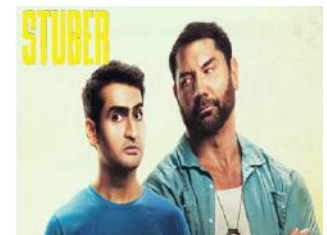

New Creative Poster

Figure 7. More English Poster Generation



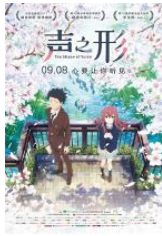

Sample Poster

声之形

Extracted Movie Title

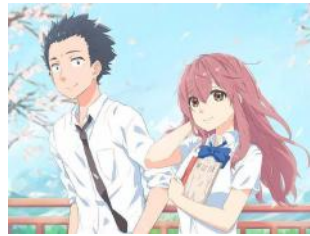

Input Background

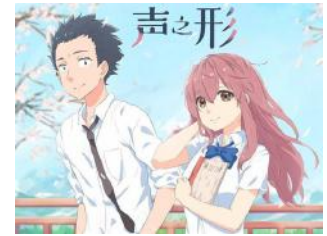

New Creative Poster

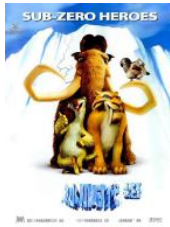

Sample Poster

冰河世纪

Extracted Movie Title

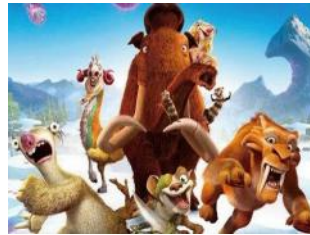

Input Background

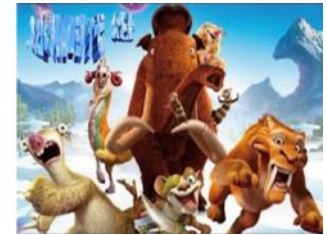

New Creative Poster

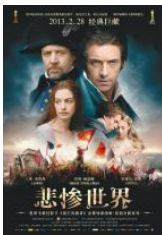

Sample Poster

悲惨世界

Extracted Movie Title

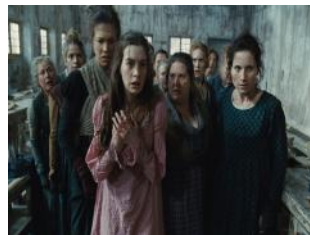

Input Background

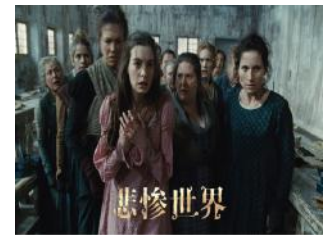

New Creative Poster

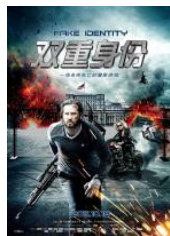

Sample Poster

双重身份

Extracted Movie Title

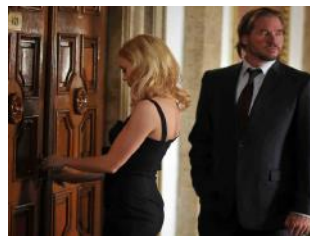

Input Background

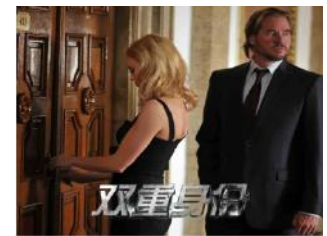

New Creative Poster

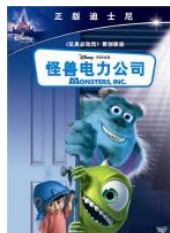

Sample Poster

怪兽电力公司

Extracted Movie Title

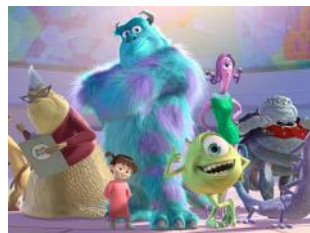

Input Background

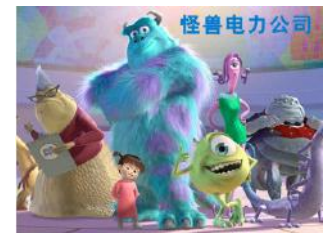

New Creative Poster

Figure 8. Chinese Poster Generation

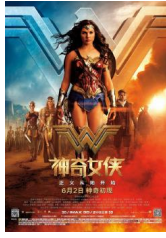

Sample Poster

神奇女侠

Extracted Movie Title

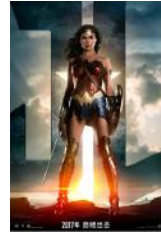

Input Background

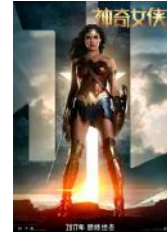

New Creative Poster

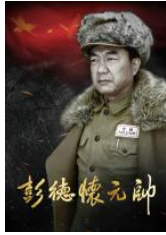

Sample Poster

彭德怀元帅

Extracted Movie Title

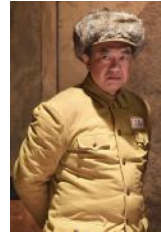

Input Background

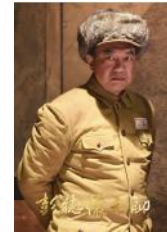

New Creative Poster

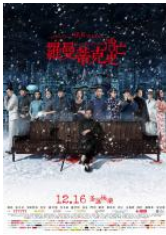

Sample Poster

射雕英雄传

Extracted Movie Title

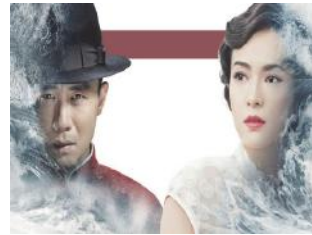

Input Background

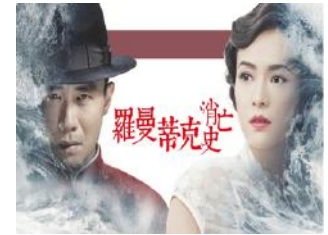

New Creative Poster

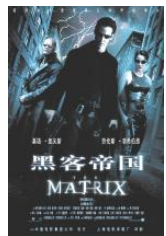

Sample Poster

黑客帝国

Extracted Movie Title

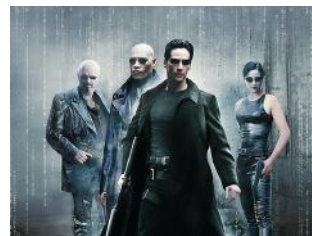

Input Background

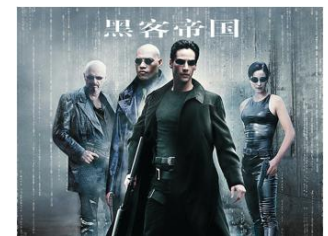

New Creative Poster

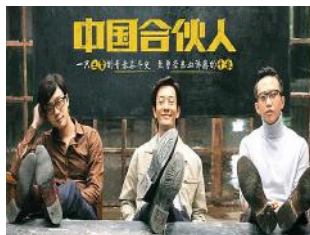

Sample Poster

中国合伙人

Extracted Movie Title

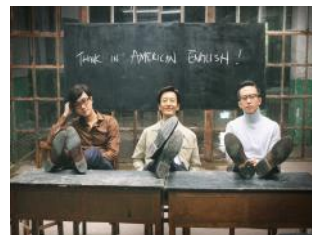

Input Background

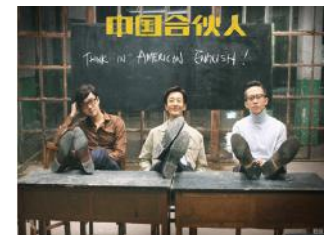

New Creative Poster

Figure 9. More Chinese Poster Generation
